CORRECTION

# Correction: S100A14 Stimulates Cell Proliferation and Induces Cell Apoptosis at Different Concentrations via Receptor for Advanced Glycation End Products (RAGE)

Qing'e Jin, Hongyan Chen, Aiping Luo, Fang Ding, Zhihua Liu

[S1 Fig](#) is omitted from the published article. Please see [S1 Fig](#) here.

## Supporting Information

**S1 Fig. Western blot analysis for secretion of S100A14 from EC9706 or KYSE180 cells.** (A) Western blot was performed to detect S100A14 in the culture media from EC9706 cells stably transfected with HA-tag S100A14 full-length plasmid. Stable EC9706 transfectants with empty vector were used as a negative control (Mock). (B) S100A14 was secreted extracellularly from KYSE180 cells whereas no S100A14 secretion could be detected in EC9706 cells. (TIF)

## Reference

1. Jin Q, Chen H, Luo A, Ding F, Liu Z (2011) S100A14 Stimulates Cell Proliferation and Induces Cell Apoptosis at Different Concentrations via Receptor for Advanced Glycation End Products (RAGE). PLoS ONE 6(4): e19375. doi: [10.1371/journal.pone.0019375](https://doi.org/10.1371/journal.pone.0019375) PMID: [21559403](https://pubmed.ncbi.nlm.nih.gov/21559403/)

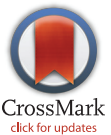

## OPEN ACCESS

**Citation:** Jin Q, Chen H, Luo A, Ding F, Liu Z (2016) Correction: S100A14 Stimulates Cell Proliferation and Induces Cell Apoptosis at Different Concentrations via Receptor for Advanced Glycation End Products (RAGE). PLoS ONE 11(1): e0147881. doi:10.1371/journal.pone.0147881

**Published:** January 22, 2016

**Copyright:** © 2016 Jin et al. This is an open access article distributed under the terms of the [Creative Commons Attribution License](https://creativecommons.org/licenses/by/4.0/), which permits unrestricted use, distribution, and reproduction in any medium, provided the original author and source are credited.
